# Supplementary material for: Mechanism of chiral recognition by enantiomorphous cytosine crystals during enantiomer adsorption
Source: Royal Society of Chemistry journal article supplement (doi:10.1039/d1cp01265g), 2021-01-01
Supplement: d1cp01265g1.pdf [file d1cp01265g1.pdf]

## Mechanism of chiral recognition by enantiomorphous cytosine crystals during enantiomer adsorption.

Vladimir Yu. Gus'kov<sup>a\*</sup>, Regina Kh. Shayakhmetova<sup>a</sup>, Darya A. Allayarova<sup>a</sup>, Yulia F. Sharafutdinova<sup>a</sup>, Elmira L. Gilfanova<sup>a</sup>, Irina N. Pavlova<sup>b</sup> and Gulnaz Z. Garipova<sup>a</sup>

<sup>a</sup>Bashkir State University, 32 Zaki Validi str., Ufa, Russia.

<sup>b</sup>Institute of Petrochemistry and Catalysis RAS, 141 Oktyabrya av., Ufa, Russia

\*corresponding author, Email: [guscov@mail.ru](mailto:guscov@mail.ru)

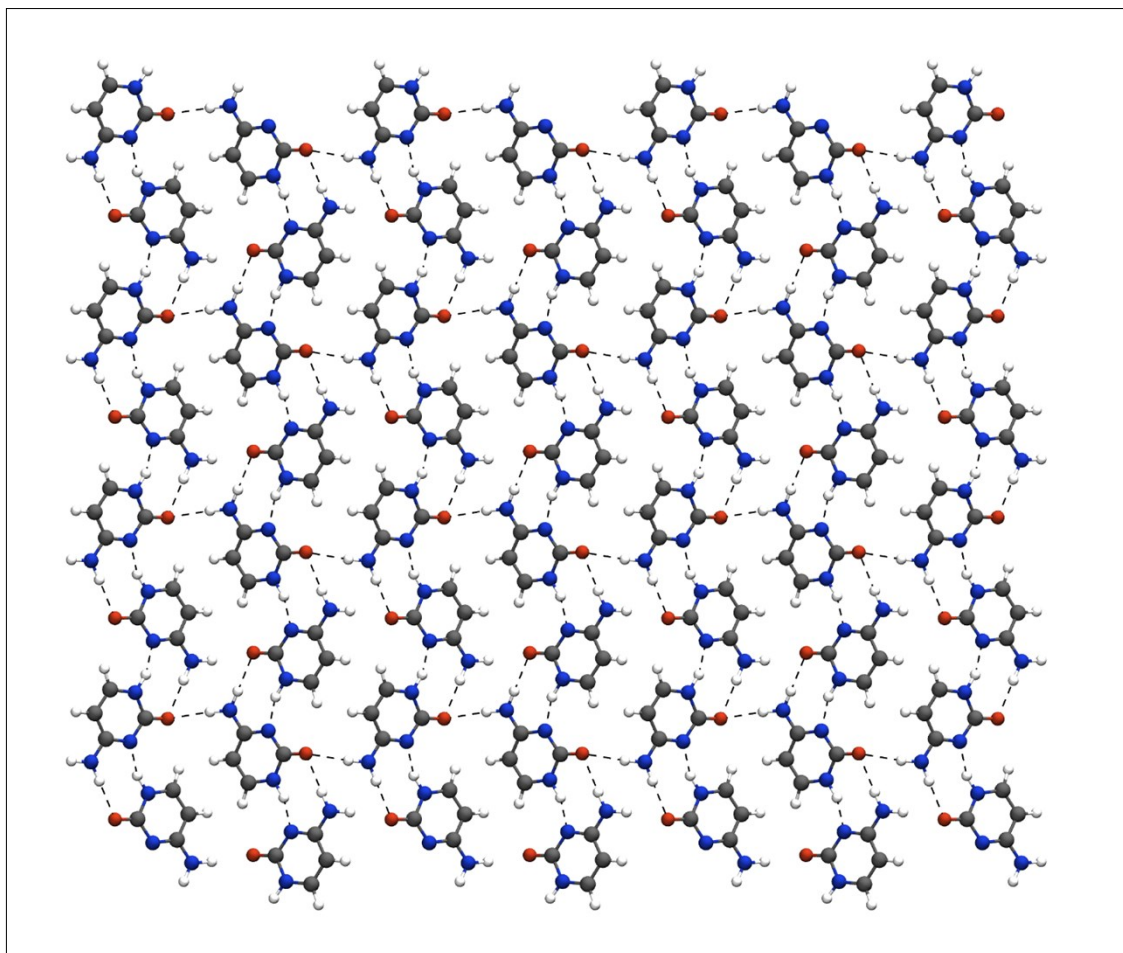

Fig. 1S. Cytosine right-handed (P)-crystal {001} face used as a surface to adsorb in MD simulations.

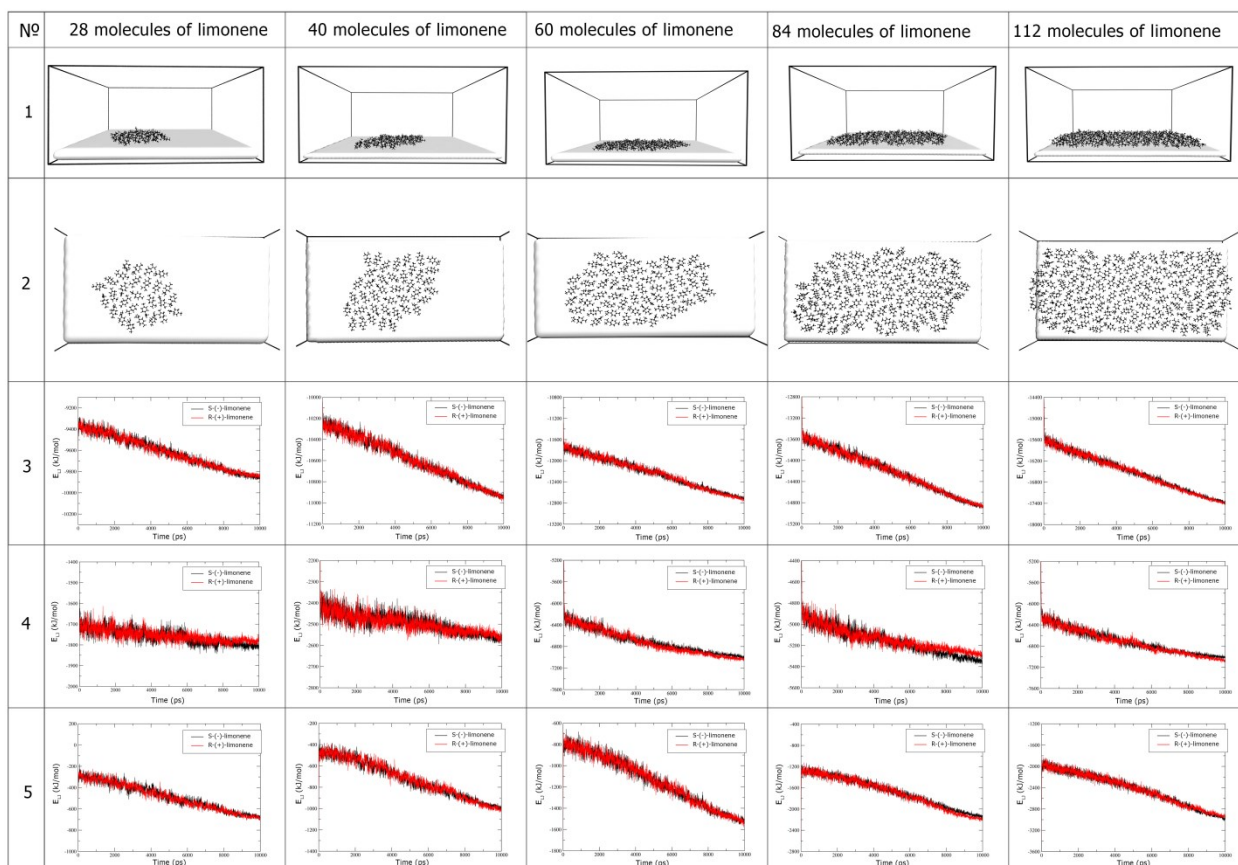

Figure 2S. Adsorption of limonene molecules on graphene surface (56 molecules):  
Line: 1: side view of the modeled box (XZ plane); 2: top view (XY plane); 3: total LJ energy variation during adsorption; 4: limonene–cytosine interaction energy variation during adsorption; 5: limonene–limonene lateral interaction energy variation during adsorption

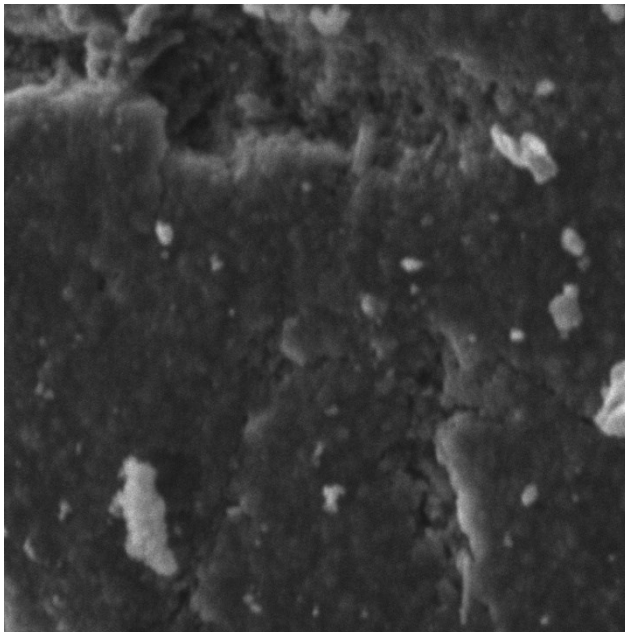

|                                |                       |                 |
|--------------------------------|-----------------------|-----------------|
| View field: 19.0 $\mu\text{m}$ | WD: 11.99 mm          | VEGA3 TESCAN    |
| SEM HV: 5.0 kV                 | Det: SE               | 5 $\mu\text{m}$ |
| Print MAG: 9.39 kx             | Date(m/d/y): 02/26/21 | ИПСМ РАН        |

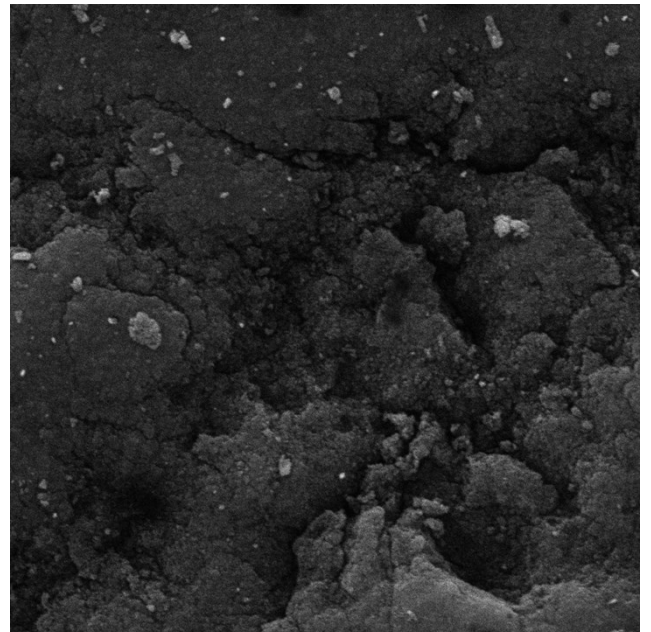

|                                |                       |                  |
|--------------------------------|-----------------------|------------------|
| View field: 37.9 $\mu\text{m}$ | WD: 12.44 mm          | VEGA3 TESCAN     |
| SEM HV: 20.0 kV                | Det: SE               | 10 $\mu\text{m}$ |
| Print MAG: 4.69 kx             | Date(m/d/y): 02/25/21 | ИПСМ РАН         |

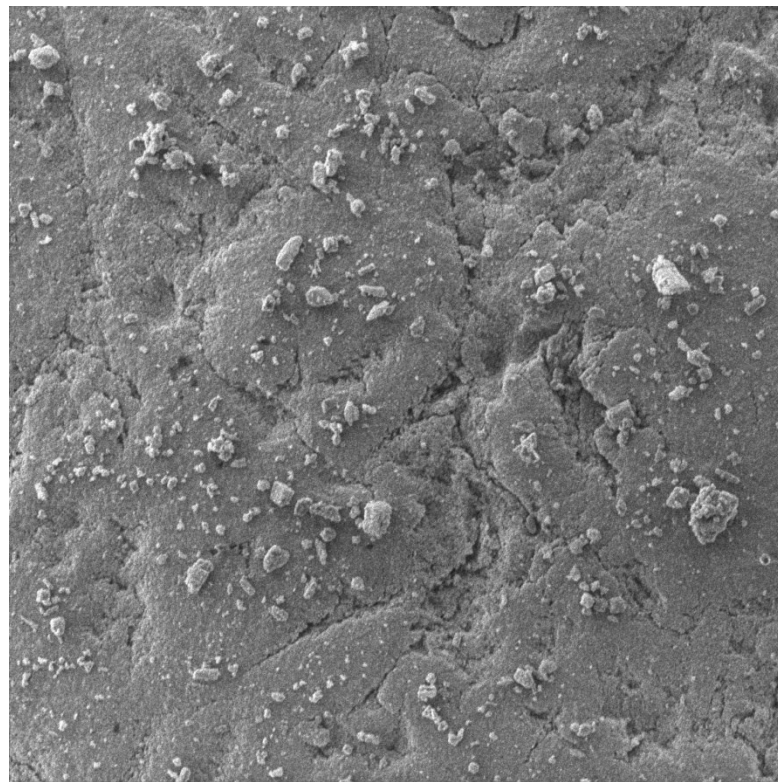

|                                |                       |                  |
|--------------------------------|-----------------------|------------------|
| View field: 94.8 $\mu\text{m}$ | WD: 11.74 mm          | VEGA3 TESCAN     |
| SEM HV: 5.0 kV                 | Det: SE               | 20 $\mu\text{m}$ |
| Print MAG: 1.88 kx             | Date(m/d/y): 02/25/21 | ИПСМ РАН         |

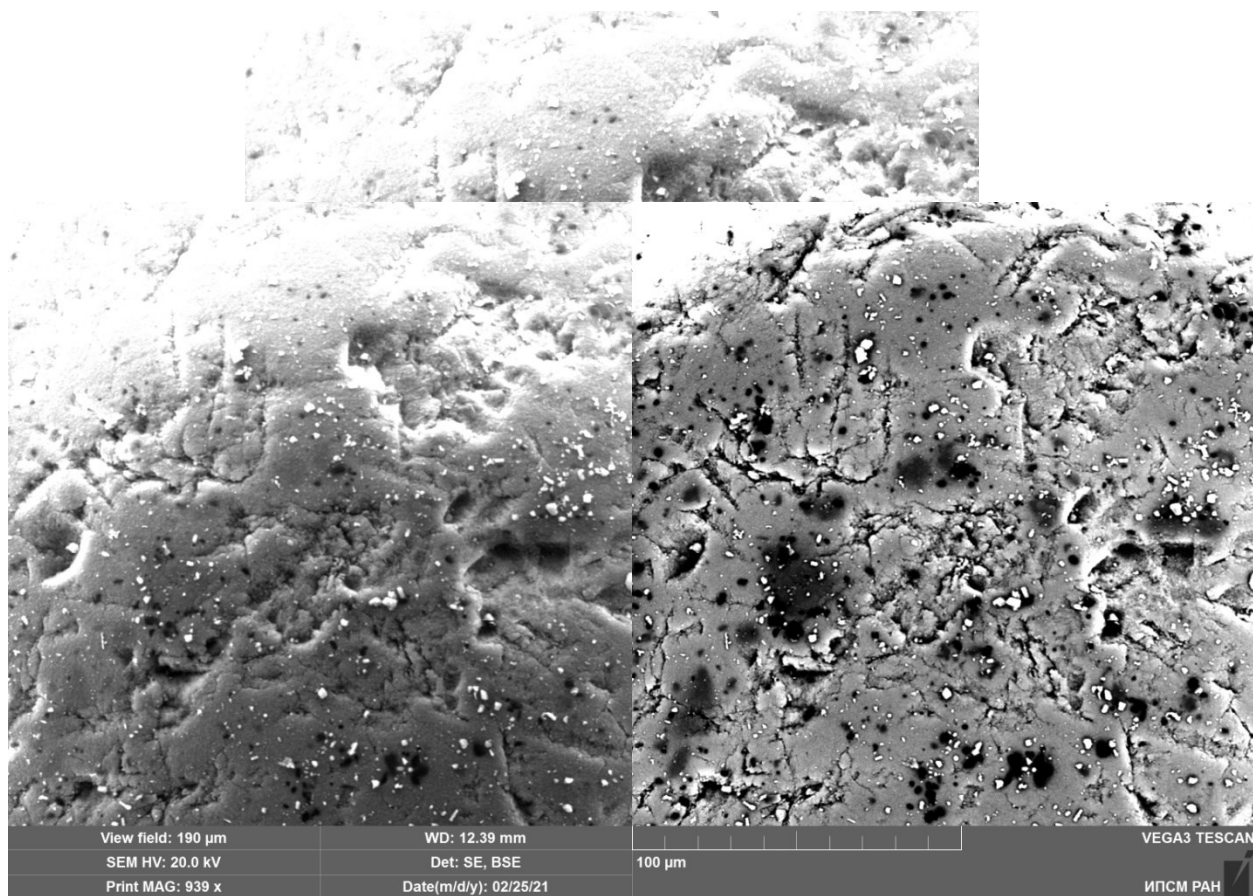

Fig. 3S. SEM images of the Dowex V503 porous polymer surface, modified by cytosine

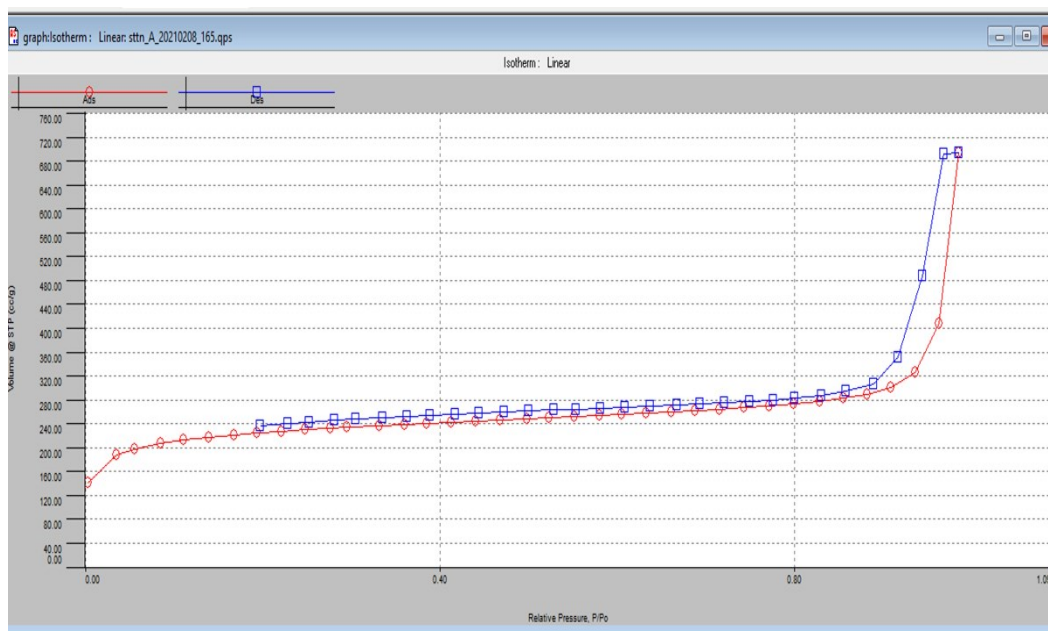

Fig 4S. Nitrogen adsorption-desorption isotherm at 77 K on initial porous polymer

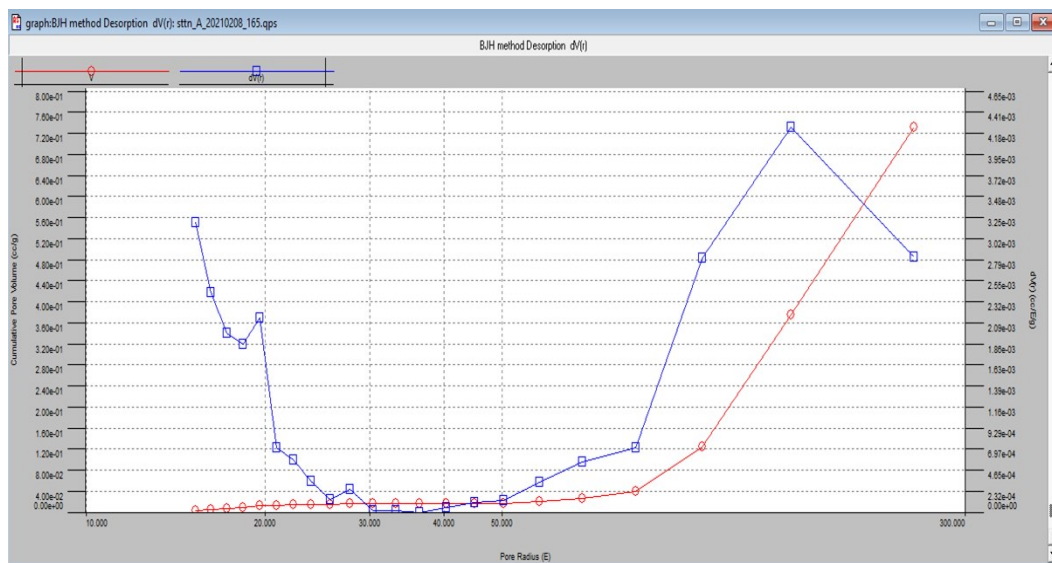

Fig 5S. Mesopore distribution by BJH on initial porous polymer



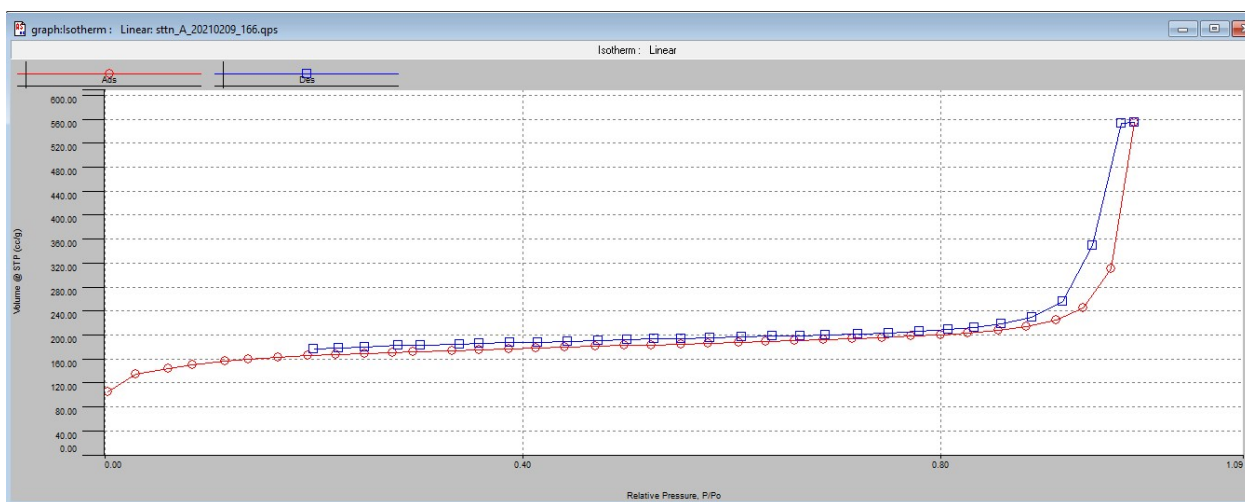

Fig 6S. Nitrogen adsorption-desorption isotherm at 77 K on porous polymer, modified by cytosine

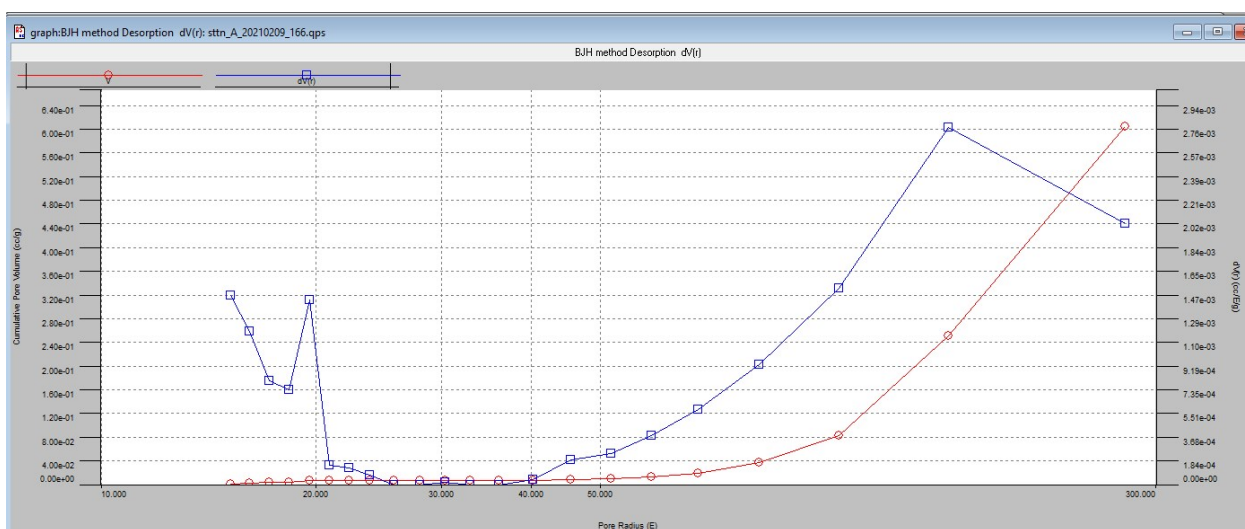

Fig 7S. Mesopore distribution by BJH porous polymer, modified by cytosine
